# Supplementary material
Source: PubMed Central journal article supplement (PMC6246813)

**Supplementary Figure S1.**

**A. Growth rate of GA area according to baseline GA area**

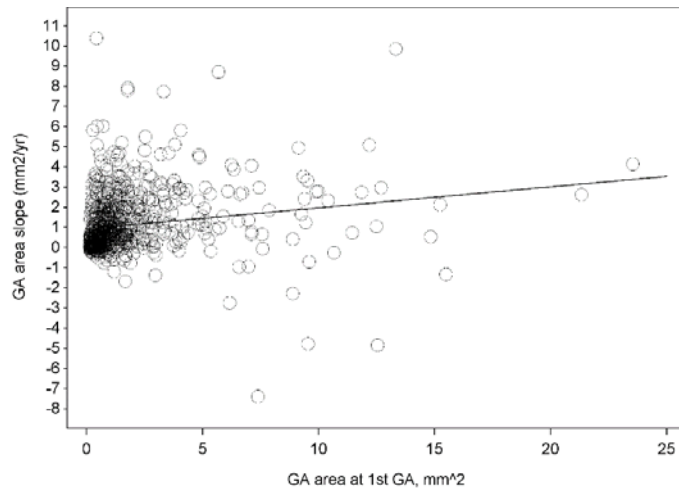

**B. Growth rate of square root GA area according to baseline square root of GA area**

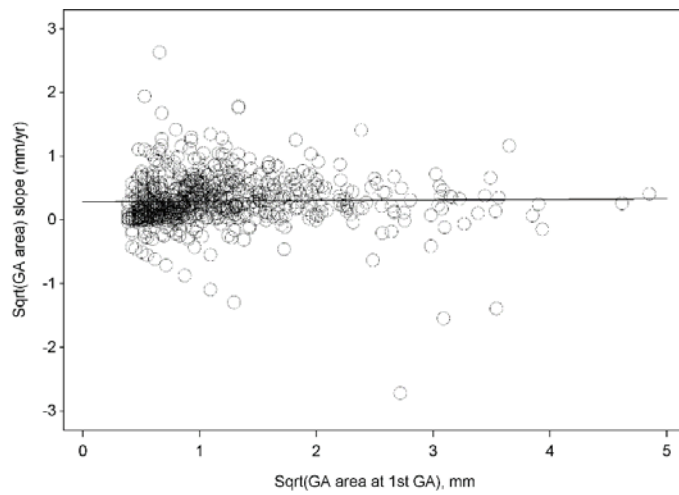

Supplement: NIHMS972605-supplement-1.pdf [file NIHMS972605-supplement-1.pdf]
