# Supplementary material
Source: PubMed Central journal article supplement (PMC6246813)
Supplement: NIHMS972605-supplement-2.pdf [file NIHMS972605-supplement-2.pdf]

Supplementary Table S1 Mixed models regression of geographic atrophy area for prevalence cohort according to clinical and imaging characteristics.

|                                                                                      |                | Change per year in square root of GA area <sup>1</sup> |             |         | Change per year in GA area <sup>2</sup> |                           |         |
|--------------------------------------------------------------------------------------|----------------|--------------------------------------------------------|-------------|---------|-----------------------------------------|---------------------------|---------|
|                                                                                      |                | Estimate (mm)                                          | 95% CI (mm) | p       | Estimate (mm <sup>2</sup> )             | 95% CI (mm <sup>2</sup> ) | p       |
| <b>Overall</b>                                                                       |                | 0.29<br>(0.17 DD)                                      | 0.27-0.30   | <0.0001 | 1.42<br>(0.61 DA)                       | 1.33-1.52                 | <0.0001 |
| <b>Central GA at baseline</b>                                                        | No             | 0.32                                                   | 0.30-0.34   | <0.0001 | 1.58                                    | 1.47-1.70                 | <0.0001 |
|                                                                                      | Yes            | 0.22                                                   | 0.19-0.24   |         | 1.11                                    | 0.95-1.27                 |         |
| <b>GA size (disc areas) at baseline</b>                                              | <0.75          | 0.27                                                   | 0.25-0.30   | 0.003   | 0.99                                    | 0.87-1.12                 | <0.0001 |
|                                                                                      | >=0.75,<1.5    | 0.36                                                   | 0.32-0.40   |         | 1.93                                    | 1.69-2.16                 |         |
|                                                                                      | >=1.5,<2.0     | 0.26                                                   | 0.20-0.32   |         | 1.50                                    | 1.15-1.84                 |         |
|                                                                                      | >=2.0,<4.0     | 0.29                                                   | 0.25-0.33   |         | 2.01                                    | 1.78-2.24                 |         |
|                                                                                      | >=4.0          | 0.24                                                   | 0.18-0.30   |         | 2.09                                    | 1.77-2.41                 |         |
| <b>Configuration at baseline</b>                                                     | Small          | 0.27                                                   | 0.24-0.29   | <0.0001 | 0.96                                    | 0.81-1.12                 | <0.0001 |
|                                                                                      | Multifocal     | 0.35                                                   | 0.32-0.38   |         | 1.69                                    | 1.50-1.89                 |         |
|                                                                                      | Horseshoe/ring | 0.29                                                   | 0.23-0.34   |         | 2.15                                    | 1.84-2.45                 |         |
|                                                                                      | Solid          | 0.24                                                   | 0.21-0.27   |         | 1.38                                    | 1.20-1.56                 |         |
|                                                                                      | Indeterminate  | 0.36                                                   | 0.28-0.43   |         | 2.36                                    | 1.95-2.78                 |         |
| <b>AREDS2 treatment</b>                                                              | Control        | 0.28                                                   | 0.25-0.31   | 0.18    | 1.43                                    | 1.24-1.63                 | 0.28    |
|                                                                                      | L/Z            | 0.29                                                   | 0.26-0.33   |         | 1.46                                    | 1.26-1.66                 |         |
|                                                                                      | DHA/EPA        | 0.31                                                   | 0.28-0.35   |         | 1.54                                    | 1.35-1.73                 |         |
|                                                                                      | Combination    | 0.26                                                   | 0.23-0.29   |         | 1.29                                    | 1.11-1.46                 |         |
| <b>DHA/EPA main effect</b>                                                           | No             | 0.29                                                   | 0.26-0.31   | 0.94    | 1.45                                    | 1.31-1.59                 | 0.63    |
|                                                                                      | Yes            | 0.28                                                   | 0.26-0.31   |         | 1.40                                    | 1.27-1.53                 |         |
| <b>Lutein/zeaxanthin</b>                                                             | No             | 0.29                                                   | 0.27-0.32   | 0.26    | 1.49                                    | 1.35-1.62                 | 0.20    |
|                                                                                      | Yes            | 0.28                                                   | 0.25-0.30   |         | 1.36                                    | 1.23-1.49                 |         |
| <b>Smoking status</b>                                                                | Never          | 0.27                                                   | 0.25-0.30   | 0.05    | 1.32                                    | 1.17-1.47                 | 0.008   |
|                                                                                      | Former         | 0.28                                                   | 0.26-0.31   |         | 1.43                                    | 1.30-1.56                 |         |
|                                                                                      | Current        | 0.36                                                   | 0.30-0.42   |         | 1.93                                    | 1.58-2.28                 |         |
| <b>Number of eyes with GA</b>                                                        | 1              | 0.19                                                   | 0.14-0.24   | <0.0001 | 0.50                                    | 0.21-0.78                 | <0.0001 |
|                                                                                      | 2              | 0.26                                                   | 0.24-0.28   |         | 1.16                                    | 1.04-1.28                 |         |
| <b>Halo hyperautofluorescence (for eyes with hypoAF at 1<sup>st</sup> GA; n=184)</b> | No             | 0.31                                                   | 0.19-0.44   | 0.71    | 1.65                                    | 0.82-2.48                 | 0.15    |
|                                                                                      | Yes            | 0.35                                                   | 0.19-0.51   |         | 2.64                                    | 1.56-3.72                 |         |

All results adjusted for age and sex; 1: results adjusted for square root of GA area at baseline; 2: results adjusted for GA area at baseline; p=p value of interaction between characteristic and year; DD=disc diameters; DA=disc areas; DHA=docosahexaenoic acid; EPA=eicosapentaenoic acid, GA=geographic atrophy; AF=autofluorescence
