# Supplementary material
Source: PubMed Central journal article supplement (PMC6246813)
Supplement: NIHMS972605-supplement-3.pdf [file NIHMS972605-supplement-3.pdf]

Supplementary Table S2: Mixed models regression of geographic atrophy area for incidence cohort according to clinical and imaging characteristics.

|                                                                                      |                | Change per year in square root of GA area <sup>1</sup> |             |         | Change per year in GA area <sup>2</sup> |                           |         |
|--------------------------------------------------------------------------------------|----------------|--------------------------------------------------------|-------------|---------|-----------------------------------------|---------------------------|---------|
|                                                                                      |                | Estimate (mm)                                          | 95% CI (mm) | p       | Estimate (mm <sup>2</sup> )             | 95% CI (mm <sup>2</sup> ) | p       |
| <b>Overall</b>                                                                       |                | 0.28<br>(0.16 DD)                                      | 0.27-0.30   | <0.0001 | 1.12<br>(0.48 DA)                       | 1.04-1.19                 | <0.0001 |
| <b>Central GA at baseline</b>                                                        | No             | 0.31                                                   | 0.29-0.33   | <0.0001 | 1.16                                    | 1.07-1.26                 | 0.08    |
|                                                                                      | Yes            | 0.24                                                   | 0.21-0.27   |         | 1.02                                    | 0.89-1.15                 |         |
| <b>GA size (disc areas) at baseline</b>                                              | <0.75          | 0.28                                                   | 0.26-0.30   | <0.0001 | 0.94                                    | 0.86-1.03                 | <0.0001 |
|                                                                                      | >=0.75,<1.5    | 0.36                                                   | 0.31-0.41   |         | 1.72                                    | 1.51-1.93                 |         |
|                                                                                      | >=1.5,<2.0     | 0.33                                                   | 0.24-0.41   |         | 1.87                                    | 1.50-2.24                 |         |
|                                                                                      | >=2.0,<4.0     | 0.22                                                   | 0.15-0.29   |         | 1.48                                    | 1.18-1.78                 |         |
|                                                                                      | >=4.0          | 0.02                                                   | -0.09-0.13  |         | 0.79                                    | 0.30-1.28                 |         |
| <b>Configuration at baseline</b>                                                     | Small          | 0.25                                                   | 0.23-0.28   | <0.0001 | 0.83                                    | 0.73-0.93                 | <0.0001 |
|                                                                                      | Multifocal     | 0.40                                                   | 0.36-0.44   |         | 1.65                                    | 1.49-1.80                 |         |
|                                                                                      | Horseshoe/ring | 0.14                                                   | 0.03-0.24   |         | 1.08                                    | 0.62-1.55                 |         |
|                                                                                      | Solid          | 0.23                                                   | 0.18-0.27   |         | 1.27                                    | 1.07-1.47                 |         |
|                                                                                      | Indeterminate  | 0.40                                                   | 0.29-0.51   |         | 2.09                                    | 1.62-2.56                 |         |
| <b>AREDS2 treatment</b>                                                              | Control        | 0.26                                                   | 0.23-0.30   | 0.32    | 1.06                                    | 0.91-1.22                 | 0.60    |
|                                                                                      | L/Z            | 0.28                                                   | 0.24-0.31   |         | 1.11                                    | 0.94-1.28                 |         |
|                                                                                      | DHA/EPA        | 0.29                                                   | 0.26-0.33   |         | 1.08                                    | 0.94-1.22                 |         |
|                                                                                      | Combination    | 0.30                                                   | 0.27-0.34   |         | 1.20                                    | 1.05-1.35                 |         |
| <b>DHA/EPA main effect</b>                                                           | No             | 0.27                                                   | 0.24-0.29   | 0.09    | 1.09                                    | 0.97-1.20                 | 0.50    |
|                                                                                      | Yes            | 0.30                                                   | 0.27-0.32   |         | 1.14                                    | 1.04-1.24                 |         |
| <b>Lutein/zeaxanthin</b>                                                             | No             | 0.28                                                   | 0.26-0.30   | 0.47    | 1.08                                    | 0.97-1.18                 | 0.27    |
|                                                                                      | Yes            | 0.29                                                   | 0.27-0.32   |         | 1.16                                    | 1.05-1.27                 |         |
| <b>Smoking status</b>                                                                | Never          | 0.28                                                   | 0.25-0.30   | 0.71    | 1.02                                    | 0.90-1.14                 | 0.03    |
|                                                                                      | Former         | 0.29                                                   | 0.26-0.31   |         | 1.15                                    | 1.04-1.26                 |         |
|                                                                                      | Current        | 0.30                                                   | 0.24-0.36   |         | 1.38                                    | 1.12-1.64                 |         |
| <b>Number of eyes with GA</b>                                                        | 1              | 0.26                                                   | 0.24-0.29   | 0.01    | 1.01                                    | 0.90-1.11                 | 0.005   |
|                                                                                      | 2              | 0.31                                                   | 0.28-0.33   |         | 1.23                                    | 1.12-1.34                 |         |
| <b>Halo hyperautofluorescence (for eyes with hypoAF at 1<sup>st</sup> GA; n=184)</b> | No             | 0.30                                                   | 0.26-0.34   | 0.05    | 1.11                                    | 0.94-1.29                 | <0.0001 |
|                                                                                      | Yes            | 0.41                                                   | 0.31-0.51   |         | 2.25                                    | 1.80-2.71                 |         |

All results adjusted for age and sex; 1: results adjusted for square root of GA area at baseline; 2: results adjusted for GA area at baseline; p=p value of interaction between characteristic and year; DD=disc diameters; DA=disc areas; DHA=docosahexaenoic acid; EPA=eicosapentaenoic acid, GA=geographic atrophy; AF=autofluorescence
