# Supplementary material
Source: PubMed Central journal article supplement (PMC6246813)
Supplement: NIHMS972605-supplement-4.pdf [file NIHMS972605-supplement-4.pdf]

Supplementary Table S3. Area of geographic atrophy (GA) at onset of GA and at annual visits, stratified by status of fellow eye with or without neovascularization.

|               |       | <b>Fellow eye does NOT have neovascularization</b> |        |      |     | <b>Fellow eye has neovascularization</b> |        |      |     |
|---------------|-------|----------------------------------------------------|--------|------|-----|------------------------------------------|--------|------|-----|
|               |       | GA area ( mm <sup>2</sup> )                        |        |      |     | GA area ( mm <sup>2</sup> )              |        |      |     |
| Years from GA | Total | N                                                  | Median | Mean | Std | N                                        | Median | Mean | Std |
| 0             | 1099  | 817                                                | 0.8    | 1.7  | 2.5 | 282                                      | 0.9    | 1.7  | 2.5 |
| 1             | 813   | 552                                                | 1.5    | 2.7  | 3.3 | 180                                      | 1.4    | 2.5  | 2.9 |
| 2             | 587   | 378                                                | 2.3    | 3.8  | 4.1 | 119                                      | 2.8    | 3.8  | 3.7 |
| 3             | 394   | 253                                                | 3.4    | 5.0  | 4.9 | 65                                       | 4.9    | 5.7  | 4.9 |
| 4             | 178   | 106                                                | 4.4    | 6.5  | 5.9 | 34                                       | 5.3    | 6.7  | 4.8 |
| 5             | 23    | 13                                                 | 4.5    | 7.9  | 8.5 | 5                                        | 2.6    | 3.1  | 2.8 |
