# Supplementary material
Source: PubMed Central journal article supplement (PMC6246813)
Supplement: NIHMS972605-supplement-5.pdf [file NIHMS972605-supplement-5.pdf]

Supplementary Table S4. Mixed models regression of geographic atrophy area for prevalence cohort according to genotype.

|                                     |           | Change per year in square root of GA area <sup>1</sup> |             |         | Change per year in GA area <sup>2</sup> |                           |         |
|-------------------------------------|-----------|--------------------------------------------------------|-------------|---------|-----------------------------------------|---------------------------|---------|
|                                     |           | Estimate (mm)                                          | 95% CI (mm) | p       | Estimate (mm <sup>2</sup> )             | 95% CI (mm <sup>2</sup> ) | p       |
| <b>Overall</b>                      |           | 0.28<br>(0.16 DD)                                      | 0.26-0.31   | <0.0001 | 1.44<br>(0.62 DA)                       | 1.29-1.59                 | <0.0001 |
| rs2740488<br>ABCA1<br>(0=A, 1=C)    | 0/0       | 0.30                                                   | 0.26-0.33   | 0.14    | 1.45                                    | 1.27-1.64                 | 0.60    |
|                                     | 0/1       | 0.28                                                   | 0.23-0.32   |         | 1.47                                    | 1.22-1.73                 |         |
|                                     | 1/1       | 0.19                                                   | 0.08-0.29   |         | 1.14                                    | 0.52-1.75                 |         |
| rs2043085<br>LIPC<br>(0=T, 1=C)     | 0/0       | 0.29                                                   | 0.21-0.36   | 0.51    | 1.31                                    | 0.87-1.75                 | 0.07    |
|                                     | 0/1       | 0.27                                                   | 0.23-0.30   |         | 1.30                                    | 1.10-1.51                 |         |
|                                     | 1/1       | 0.30                                                   | 0.26-0.34   |         | 1.66                                    | 1.42-1.89                 |         |
| rs2070895<br>LIPC<br>(0=G, 1=A)     | 0/0       | 0.28                                                   | 0.25-0.31   | 0.05    | 1.36                                    | 1.18-1.53                 | 0.01    |
|                                     | 0/1       | 0.31                                                   | 0.27-0.36   |         | 1.69                                    | 1.43-1.96                 |         |
|                                     | 1/1       | 0.07                                                   | -0.13-0.27  |         | 0.22                                    | -0.96-1.39                |         |
| rs17231506<br>CETP<br>(0=C, 1=T)    | 0/0       | 0.28                                                   | 0.25-0.32   | 0.99    | 1.50                                    | 1.29-1.71                 | 0.64    |
|                                     | 0/1       | 0.29                                                   | 0.25-0.33   |         | 1.35                                    | 1.12-1.59                 |         |
|                                     | 1/1       | 0.28                                                   | 0.21-0.36   |         | 1.48                                    | 1.04-1.92                 |         |
| rs5817082<br>CETP<br>(0=C, 1=A)     | 0/0       | 0.28                                                   | 0.25-0.32   | 0.94    | 1.42                                    | 1.22-1.62                 | 0.23    |
|                                     | 0/1       | 0.29                                                   | 0.24-0.33   |         | 1.38                                    | 1.15-1.62                 |         |
|                                     | 1/1       | 0.30                                                   | 0.20-0.39   |         | 1.89                                    | 1.35-2.43                 |         |
| rs429358<br>APOE (0=T, 1=C)         | 0/0       | 0.29                                                   | 0.26-0.32   | 0.18    | 1.44                                    | 1.27-1.62                 | 0.92    |
|                                     | 0/1 & 1/1 | 0.26                                                   | 0.21-0.30   |         | 1.43                                    | 1.14-1.71                 |         |
| rs73036519<br>APOE<br>(0=G, 1=C)    | 0/0       | 0.26                                                   | 0.22-0.29   | 0.04    | 1.28                                    | 1.08-1.48                 | 0.05    |
|                                     | 0/1       | 0.32                                                   | 0.27-0.36   |         | 1.61                                    | 1.36-1.86                 |         |
|                                     | 1/1       | 0.33                                                   | 0.25-0.41   |         | 1.73                                    | 1.29-2.17                 |         |
| rs10490924<br>ARMS2<br>(0=G, 1=T)   | 0/0       | 0.23                                                   | 0.19-0.28   | 0.01    | 1.18                                    | 0.94-1.42                 | 0.02    |
|                                     | 0/1       | 0.32                                                   | 0.28-0.35   |         | 1.52                                    | 1.30-1.75                 |         |
|                                     | 1/1       | 0.30                                                   | 0.24-0.35   |         | 1.72                                    | 1.40-2.04                 |         |
| rs1061170<br>CFH<br>(0=T, 1=C)      | 0/0       | 0.28                                                   | 0.22-0.34   | 0.66    | 1.51                                    | 1.16-1.85                 | 0.25    |
|                                     | 0/1       | 0.27                                                   | 0.23-0.31   |         | 1.30                                    | 1.08-1.52                 |         |
|                                     | 1/1       | 0.30                                                   | 0.26-0.34   |         | 1.56                                    | 1.33-1.80                 |         |
| rs10922109<br>CFH<br>(0=C, 1=A)     | 0/0       | 0.28                                                   | 0.25-0.32   | 0.11    | 1.48                                    | 1.30-1.66                 | 0.03    |
|                                     | 0/1       | 0.30                                                   | 0.25-0.35   |         | 1.48                                    | 1.22-1.75                 |         |
|                                     | 1/1       | 0.16                                                   | 0.03-0.28   |         | 0.50                                    | -0.22-1.22                |         |
| rs61818925<br>CFH<br>(0=G, 1=T)     | 0/0       | 0.29                                                   | 0.25-0.32   | 0.10    | 1.56                                    | 1.35-1.76                 | 0.05    |
|                                     | 0/1       | 0.30                                                   | 0.26-0.33   |         | 1.41                                    | 1.19-1.64                 |         |
|                                     | 1/1       | 0.19                                                   | 0.10-0.28   |         | 0.87                                    | 0.35-1.38                 |         |
| rs12144939<br>CFH (0=G, 1=T)        | 0/0       | 0.20                                                   | 0.01-0.39   | 0.42    | 0.54                                    | -0.55-1.63                | 0.05    |
|                                     | 0/1       | 0.26                                                   | 0.19-0.32   |         | 1.13                                    | 0.76-1.50                 |         |
| rs800292<br>CFH (0=G, 1=A)          | 0/0       | 0.28                                                   | 0.25-0.31   | 0.75    | 1.41                                    | 1.25-1.58                 | 0.63    |
|                                     | 0/1       | 0.29                                                   | 0.24-0.35   |         | 1.50                                    | 1.18-1.82                 |         |
| rs10033900<br>CFI<br>(0=C, 1=T)     | 0/0       | 0.24                                                   | 0.19-0.29   | 0.02    | 1.27                                    | 1.00-1.54                 | 0.03    |
|                                     | 0/1       | 0.32                                                   | 0.28-0.36   |         | 1.66                                    | 1.44-1.88                 |         |
|                                     | 1/1       | 0.27                                                   | 0.22-0.32   |         | 1.24                                    | 0.96-1.53                 |         |
| rs17440077<br>CFI<br>(0=A, 1=G)     | 0/0       | 0.30                                                   | 0.22-0.38   | 0.74    | 1.66                                    | 1.19-2.13                 | 0.56    |
|                                     | 0/1       | 0.27                                                   | 0.23-0.31   |         | 1.45                                    | 1.22-1.68                 |         |
|                                     | 1/1       | 0.29                                                   | 0.25-0.32   |         | 1.38                                    | 1.17-1.59                 |         |
| rs116503776<br>C2/CFB (0=G, 1=A)    | 0/0       | 0.28                                                   | 0.25-0.30   | 0.17    | 1.42                                    | 1.26-1.58                 | 0.49    |
|                                     | 0/1 & 1/1 | 0.33                                                   | 0.26-0.39   |         | 1.57                                    | 1.18-1.95                 |         |
| rs114254831<br>C2/CFB<br>(0=A, 1=G) | 0/0       | 0.29                                                   | 0.25-0.32   | 0.79    | 1.55                                    | 1.33-1.76                 | 0.16    |
|                                     | 0/1       | 0.29                                                   | 0.25-0.32   |         | 1.40                                    | 1.18-1.62                 |         |
|                                     | 1/1       | 0.25                                                   | 0.16-0.34   |         | 1.01                                    | 0.49-1.54                 |         |
| rs2230199<br>C3<br>(0=C, 1=G)       | 0/0       | 0.30                                                   | 0.27-0.34   | 0.11    | 1.61                                    | 1.41-1.80                 | 0.01    |
|                                     | 0/1       | 0.27                                                   | 0.23-0.31   |         | 1.32                                    | 1.08-1.56                 |         |
|                                     | 1/1       | 0.21                                                   | 0.13-0.30   |         | 0.83                                    | 0.33-1.34                 |         |

All results adjusted for age and sex; 1: results adjusted for square root of GA area at baseline; 2: results adjusted for GA area at baseline; p=p value of interaction between SNP and year; DD=disc diameters; DA=disc areas; GA=geographic atrophy; AF=autofluorescence
