# Supplementary material
Source: PubMed Central journal article supplement (PMC6246813)
Supplement: NIHMS972605-supplement-6.pdf [file NIHMS972605-supplement-6.pdf]

Supplementary Table S5. Mixed models regression of geographic atrophy area for incidence cohort according to genotype.

|                   |           | Change per year in square root of GA area <sup>1</sup> |             |         | Change per year in GA area <sup>2</sup> |                           |         |
|-------------------|-----------|--------------------------------------------------------|-------------|---------|-----------------------------------------|---------------------------|---------|
|                   |           | Estimate (mm)                                          | 95% CI (mm) | p       | Estimate (mm <sup>2</sup> )             | 95% CI (mm <sup>2</sup> ) | p       |
| <b>Overall</b>    |           | 0.27 (0.16 DD)                                         | 0.25-0.30   | <0.0001 | 1.07 (0.46 DA)                          | 0.97-1.17                 | <0.0001 |
| rs2740488         | 0/0       | 0.30                                                   | 0.26-0.33   | 0.19    | 1.20                                    | 1.05-1.134                | 0.05    |
| ABCA1             | 0/1       | 0.25                                                   | 0.22-0.29   |         | 0.95                                    | 0.81-1.10                 |         |
| (0=A, 1=C)        | 1/1       | 0.27                                                   | 0.15-0.38   |         | 0.91                                    | 0.41-1.41                 |         |
| rs2043085         | 0/0       | 0.31                                                   | 0.25-0.37   | 0.14    | 1.26                                    | 0.99-1.53                 | 0.03    |
| LIPC              | 0/1       | 0.25                                                   | 0.21-0.28   |         | 0.92                                    | 0.77-1.07                 |         |
| (0=T, 1=C)        | 1/1       | 0.29                                                   | 0.26-0.33   |         | 1.16                                    | 1.01-1.31                 |         |
| rs2070895         | 0/0       | 0.28                                                   | 0.25-0.31   | 0.73    | 1.11                                    | 0.98-1.23                 | 0.41    |
| LIPC              | 0/1       | 0.27                                                   | 0.23-0.31   |         | 1.02                                    | 0.85-1.20                 |         |
| (0=G, 1=A)        | 1/1       | 0.22                                                   | 0.05-0.39   |         | 0.67                                    | -0.06-1.39                |         |
| rs17231506        | 0/0       | 0.28                                                   | 0.24-0.31   | 0.002   | 1.11                                    | 0.97-1.26                 | 0.003   |
| CETP              | 0/1       | 0.31                                                   | 0.27-0.35   |         | 1.18                                    | 1.02-1.35                 |         |
| (0=C, 1=T)        | 1/1       | 0.19                                                   | 0.13-0.24   |         | 0.68                                    | 0.43-0.92                 |         |
| rs5817082         | 0/0       | 0.26                                                   | 0.23-0.29   | 0.18    | 0.97                                    | 0.83-1.10                 | 0.02    |
| CETP              | 0/1       | 0.30                                                   | 0.27-0.34   |         | 1.26                                    | 1.10-1.43                 |         |
| (0=C, 1=A)        | 1/1       | 0.25                                                   | 0.16-0.35   |         | 0.90                                    | 0.50-1.32                 |         |
| rs429358          | 0/0       | 0.28                                                   | 0.25-0.31   | 0.37    | 1.08                                    | 0.97-1.20                 | 0.65    |
| APOE (0=T, 1=C)   | 0/1 & 1/1 | 0.26                                                   | 0.21-0.30   |         | 1.03                                    | 0.83-1.23                 |         |
|                   |           |                                                        |             |         |                                         |                           |         |
| rs73036519        | 0/0       | 0.25                                                   | 0.22-0.28   | 0.02    | 0.94                                    | 0.80-1.08                 | 0.002   |
| APOE              | 0/1       | 0.31                                                   | 0.28-0.35   |         | 1.28                                    | 1.13-1.44                 |         |
| (0=G, 1=C)        | 1/1       | 0.24                                                   | 0.16-0.31   |         | 0.82                                    | 0.50-1.14                 |         |
| rs10490924        | 0/0       | 0.23                                                   | 0.19-0.26   | 0.002   | 0.84                                    | 0.68-1.00                 | 0.0001  |
| ARMS2             | 0/1       | 0.29                                                   | 0.25-0.32   |         | 1.12                                    | 0.96-1.27                 |         |
| (0=G, 1=T)        | 1/1       | 0.34                                                   | 0.29-0.39   |         | 1.42                                    | 1.20-1.65                 |         |
| rs1061170         | 0/0       | 0.35                                                   | 0.29-0.41   | 0.03    | 1.60                                    | 1.34-1.86                 | <0.0001 |
| CFH               | 0/1       | 0.26                                                   | 0.22-0.29   |         | 1.01                                    | 0.86-1.16                 |         |
| (0=T, 1=C)        | 1/1       | 0.27                                                   | 0.23-0.30   |         | 0.94                                    | 0.79-1.09                 |         |
| rs10922109        | 0/0       | 0.26                                                   | 0.24-0.29   | 0.14    | 0.96                                    | 0.84-1.08                 | 0.002   |
| CFH               | 0/1       | 0.29                                                   | 0.24-0.33   |         | 1.28                                    | 1.09-1.47                 |         |
| (0=C, 1=A)        | 1/1       | 0.38                                                   | 0.26-0.50   |         | 1.63                                    | 1.12-2.15                 |         |
| rs61818925        | 0/0       | 0.26                                                   | 0.23-0.29   | 0.26    | 0.92                                    | 0.79-1.06                 | 0.002   |
| CFH               | 0/1       | 0.29                                                   | 0.25-0.33   |         | 1.20                                    | 1.03-1.36                 |         |
| (0=G, 1=T)        | 1/1       | 0.30                                                   | 0.22-0.39   |         | 1.48                                    | 1.13-1.83                 |         |
| rs12144939        | 0/0       | 0.33                                                   | 0.26-0.39   | 0.09    | 1.46                                    | 1.18-1.74                 | 0.004   |
| CFH (0=G, 1=T)    | 0/1       | 0.27                                                   | 0.24-0.29   |         | 1.01                                    | 0.90-1.12                 |         |
| rs800292          | 0/0       | 0.26                                                   | 0.20-0.31   | 0.52    | 1.08                                    | 0.85-1.31                 | 0.90    |
| CFH (0=G, 1=A)    | 0/1       | 0.28                                                   | 0.25-0.30   |         | 1.06                                    | 0.95-1.17                 |         |
| rs10033900        | 0/0       | 0.25                                                   | 0.20-0.30   | 0.31    | 1.01                                    | 0.79-1.23                 | 0.18    |
| CFI               | 0/1       | 0.29                                                   | 0.26-0.32   |         | 1.16                                    | 1.02-1.29                 |         |
| (0=C, 1=T)        | 1/1       | 0.26                                                   | 0.22-0.31   |         | 0.94                                    | 0.75-1.14                 |         |
| rs17440077        | 0/0       | 0.26                                                   | 0.19-0.32   | 0.83    | 0.89                                    | 0.61-1.17                 | 0.28    |
| CFI               | 0/1       | 0.27                                                   | 0.24-0.31   |         | 1.05                                    | 0.90-1.20                 |         |
| (0=A, 1=G)        | 1/1       | 0.28                                                   | 0.24-0.32   |         | 1.15                                    | 0.99-1.23                 |         |
| rs116503776       | 0/0       | 0.28                                                   | 0.25-0.30   | 0.42    | 1.10                                    | 0.99-1.21                 | 0.14    |
| C2/CFB (0=G, 1=A) | 0/1 & 1/1 | 0.25                                                   | 0.19-0.31   |         | 0.90                                    | 0.65-1.15                 |         |
|                   |           |                                                        |             |         |                                         |                           |         |
| rs114254831       | 0/0       | 0.29                                                   | 0.26-0.32   | 0.08    | 1.07                                    | 0.93-1.21                 | 0.06    |
| C2/CFB            | 0/1       | 0.28                                                   | 0.24-0.32   |         | 1.17                                    | 1.01-1.33                 |         |
| (0=A, 1=G)        | 1/1       | 0.20                                                   | 0.13-0.27   |         | 0.74                                    | 0.43-1.05                 |         |

|                               |     |      |           |        |      |           |         |
|-------------------------------|-----|------|-----------|--------|------|-----------|---------|
| rs2230199<br>C3<br>(0=C, 1=G) | 0/0 | 0.31 | 0.27-0.34 | 0.0004 | 1.26 | 1.12-1.40 | <0.0001 |
|                               | 0/1 | 0.26 | 0.23-0.30 |        | 0.95 | 0.80-1.10 |         |
|                               | 1/1 | 0.14 | 0.05-0.22 |        | 0.53 | 0.18-0.87 |         |

All results adjusted for age and sex; 1: results adjusted for square root of GA area at baseline; 2: results adjusted for GA area at baseline; p=p value of interaction between SNP and year; DD=disc diameters; DA=disc areas; GA=geographic atrophy; AF=autofluorescence
