# Supplementary material
Source: PubMed Central journal article supplement (PMC6246813)
Supplement: NIHMS972605-supplement-7.pdf [file NIHMS972605-supplement-7.pdf]

Supplementary Table S6. Participant genetic characteristics of eyes with incident central and non-central geographic atrophy at first appearance

|                                     |     | Total | Central GA at first appearance of GA |     |       |    | p    |
|-------------------------------------|-----|-------|--------------------------------------|-----|-------|----|------|
|                                     |     |       | No                                   |     | Yes   |    |      |
|                                     |     |       | N                                    | n   | Row % | n  |      |
| rs2740488<br>ABCA1<br>(0=A, 1=C)    | 0/0 | 285   | 182                                  | 64  | 103   | 36 | 0.36 |
|                                     | 0/1 | 225   | 157                                  | 70  | 68    | 30 |      |
|                                     | 1/1 | 22    | 14                                   | 64  | 8     | 36 |      |
| rs2043085<br>LIPC<br>(0=T, 1=C)     | 0/0 | 74    | 49                                   | 66  | 25    | 34 | 0.98 |
|                                     | 0/1 | 229   | 153                                  | 67  | 76    | 33 |      |
|                                     | 1/1 | 229   | 151                                  | 66  | 78    | 34 |      |
| rs2070895<br>LIPC<br>(0=G, 1=A)     | 0/0 | 343   | 232                                  | 68  | 111   | 32 | 0.40 |
|                                     | 0/1 | 177   | 115                                  | 65  | 62    | 35 |      |
|                                     | 1/1 | 12    | 6                                    | 50  | 6     | 50 |      |
| rs17231506<br>CETP<br>(0=C, 1=T)    | 0/0 | 245   | 168                                  | 69  | 77    | 31 | 0.24 |
|                                     | 0/1 | 197   | 132                                  | 67  | 65    | 33 |      |
|                                     | 1/1 | 90    | 53                                   | 59  | 37    | 41 |      |
| rs5817082<br>CETP<br>(0=C, 1=A)     | 0/0 | 305   | 196                                  | 64  | 109   | 36 | 0.42 |
|                                     | 0/1 | 193   | 132                                  | 68  | 61    | 32 |      |
|                                     | 1/1 | 34    | 25                                   | 74  | 9     | 26 |      |
| rs429358<br>APOE<br>(0=T, 1=C)      | 0/0 | 425   | 281                                  | 66  | 144   | 34 | 0.71 |
|                                     | 0/1 | 104   | 69                                   | 66  | 35    | 34 |      |
|                                     | 1/1 | 3     | 3                                    | 100 | 0     | 0  |      |
| rs73036519<br>APOE<br>(0=G, 1=C)    | 0/0 | 261   | 172                                  | 66  | 89    | 34 | 0.98 |
|                                     | 0/1 | 229   | 153                                  | 67  | 76    | 33 |      |
|                                     | 1/1 | 42    | 28                                   | 67  | 14    | 33 |      |
| rs10490924<br>ARMS2<br>(0=G, 1=T)   | 0/0 | 196   | 123                                  | 63  | 73    | 37 | 0.34 |
|                                     | 0/1 | 227   | 153                                  | 67  | 74    | 33 |      |
|                                     | 1/1 | 109   | 77                                   | 71  | 32    | 29 |      |
| rs1061170<br>CFH<br>(0=T, 1=C)      | 0/0 | 75    | 53                                   | 71  | 22    | 29 | 0.64 |
|                                     | 0/1 | 224   | 145                                  | 65  | 79    | 35 |      |
|                                     | 1/1 | 233   | 155                                  | 67  | 78    | 33 |      |
| rs10922109<br>CFH<br>(0=C, 1=A)     | 0/0 | 376   | 249                                  | 66  | 127   | 34 | 0.28 |
|                                     | 0/1 | 138   | 89                                   | 64  | 49    | 36 |      |
|                                     | 1/1 | 18    | 15                                   | 83  | 3     | 17 |      |
| rs61818925<br>CFH<br>(0=G, 1=T)     | 0/0 | 308   | 210                                  | 68  | 98    | 32 | 0.16 |
|                                     | 0/1 | 186   | 123                                  | 66  | 63    | 34 |      |
|                                     | 1/1 | 38    | 20                                   | 53  | 18    | 47 |      |
| rs12144939<br>CFH<br>(0=G, 1=T)     | 0/0 | 459   | 304                                  | 66  | 155   | 34 | 0.31 |
|                                     | 0/1 | 68    | 44                                   | 65  | 24    | 35 |      |
|                                     | 1/1 | 5     | 5                                    | 100 | 0     | 0/ |      |
| rs800292<br>CFH<br>(0=G, 1=A)       | 0/0 | 436   | 285                                  | 65  | 151   | 35 | 0.60 |
|                                     | 0/1 | 93    | 66                                   | 71  | 27    | 29 |      |
|                                     | 1/1 | 3     | 2                                    | 67  | 1     | 33 |      |
| rs10033900<br>CFI<br>(0=C, 1=T)     | 0/0 | 117   | 71                                   | 61  | 46    | 39 | 0.02 |
|                                     | 0/1 | 268   | 193                                  | 72  | 75    | 28 |      |
|                                     | 1/1 | 147   | 89                                   | 61  | 58    | 39 |      |
| rs17440077<br>CFI<br>(0=A, 1=G)     | 0/0 | 239   | 155                                  | 65  | 84    | 35 | 0.68 |
|                                     | 0/1 | 219   | 146                                  | 67  | 73    | 33 |      |
|                                     | 1/1 | 74    | 52                                   | 70  | 22    | 30 |      |
| rs116503776<br>C2/CFB<br>(0=G, 1=A) | 0/0 | 452   | 298                                  | 66  | 154   | 34 | 0.86 |
|                                     | 0/1 | 77    | 53                                   | 69  | 24    | 31 |      |
|                                     | 1/1 | 3     | 2                                    | 67  | 1     | 33 |      |
| rs114254831<br>C2/CFB<br>(0=A, 1=G) | 0/0 | 259   | 178                                  | 69  | 81    | 31 | 0.43 |
|                                     | 0/1 | 223   | 141                                  | 63  | 82    | 37 |      |
|                                     | 1/1 | 50    | 34                                   | 68  | 16    | 32 |      |
| rs2230199<br>C3                     | 0/0 | 262   | 176                                  | 67  | 86    | 33 | 0.85 |
|                                     | 0/1 | 227   | 150                                  | 66  | 77    | 34 |      |

|            |     |    |    |    |    |    |  |
|------------|-----|----|----|----|----|----|--|
| (0=C, 1=G) | 1/1 | 43 | 27 | 63 | 16 | 37 |  |
|------------|-----|----|----|----|----|----|--|

GA=geographic atrophy
