# Supplementary material
Source: PubMed Central journal article supplement (PMC6246813)
Supplement: NIHMS972605-supplement-8.pdf [file NIHMS972605-supplement-8.pdf]

Supplementary Table S7. Best-corrected visual acuity according to time from first appearance of geographic atrophy

| Time from first appearance of GA (years) | n    | All: BCVA |      | GA that was non-central at first appearance: BCVA |      | GA that was central at first appearance: BCVA |      |
|------------------------------------------|------|-----------|------|---------------------------------------------------|------|-----------------------------------------------|------|
|                                          |      | Mean      | SD   | Mean                                              | SD   | Mean                                          | SD   |
| 0                                        | 1351 | 70.0      | 17.9 | 74.9                                              | 13.3 | 59.4                                          | 21.6 |
| 1                                        | 1318 | 67.3      | 19.7 | 73.3                                              | 15.0 | 55.2                                          | 22.4 |
| 2                                        | 1065 | 64.1      | 21.7 | 70.6                                              | 17.7 | 50.3                                          | 23.1 |
| 3                                        | 845  | 62.1      | 22.5 | 68.8                                              | 18.8 | 48.2                                          | 23.1 |
| 4                                        | 596  | 60.4      | 22.7 | 67.2                                              | 18.8 | 46.1                                          | 23.7 |
| 5                                        | 408  | 57.7      | 23.2 | 64.2                                              | 20.0 | 43.9                                          | 23.7 |
| 6                                        | 304  | 56.5      | 23.4 | 62.7                                              | 20.2 | 43.9                                          | 24.6 |

BCVA=best corrected visual acuity; SD=standard deviation
